# Inferring parameters for a lattice-free model of cell migration and proliferation using experimental data.

Alexander P. Browning<sup>a</sup>, Scott W. McCue<sup>a</sup>, Rachelle N. Binny<sup>b,c,d</sup>, Michael J. Plank<sup>b,d</sup>, Esha T. Shah<sup>e</sup>, Matthew J. Simpson<sup>a,\*</sup>

<sup>a</sup>*School of Mathematical Sciences, Queensland University of Technology (QUT), Brisbane, Australia.*

<sup>b</sup>*Landcare Research, Lincoln, Canterbury, New Zealand.*

<sup>c</sup>*Biomathematics Research Centre, University of Canterbury, Christchurch, New Zealand.*

<sup>d</sup>*Te Pūnaha Matatini, a New Zealand Centre of Research Excellence, New Zealand.*

<sup>e</sup>*Ghrelin Research Group, Translational Research Institute, QUT, 37 Kent St, Woolloongabba, Queensland, Australia.*

---

## Abstract

Collective cell spreading takes place in spatially continuous environments, yet it is often modelled using discrete lattice-based approaches. Here, we use data from a series of cell proliferation assays, with a prostate cancer cell line, to calibrate a spatially continuous individual based model (IBM) of collective cell migration and proliferation. The IBM explicitly accounts for crowding effects by modifying the rate of movement, direction of movement, and the rate of proliferation by accounting for pair-wise interactions. Taking a Bayesian approach we estimate the free parameters in the IBM using rejection sampling on three separate, independent experimental data sets. Since the posterior parameter estimates from each experiment are similar, we combine the estimates. Performing simulations with parameters sampled from the combined distribution allows us to confirm the predictive power of the calibrated IBM by accurately forecasting the evolution of a fourth, experimental data set. Overall, we show how to calibrate a lattice-free IBM to experimental data, and our work highlights the importance of interactions between individuals. Despite great care taken to distribute cells as uniformly as possible experimentally, we find evidence of significant spatial clustering over short distances, suggesting that standard mean-field models could be inappropriate.

*Keywords:* individual based model, cell migration, model calibration, cell proliferation assay, approximate Bayesian computation

---

\*Corresponding author at: Mathematical Sciences, QUT, Brisbane, Australia. Tel.:+617 3138 5241; fax:+617 3138 2310

*Email address:* [matthew.simpson@qut.edu.au](mailto:matthew.simpson@qut.edu.au) ( Matthew J. Simpson)

## 1. Introduction

One of the most common *in vitro* cell biology experiments is called a *cell proliferation assay* (Bosco et al., 2015; Bourseguin et al., 2016; Browning et al., 2017). These assays are conducted by placing a monolayer of cells, at low density, on a two-dimensional substrate. Individual cells undergo proliferation and movement events, and the assay is monitored over time as the density of cells in the monolayer increases (Tremel et al., 2009). One approach to interpret a cell proliferation assay is to use a mathematical model. Calibrating the solution of a mathematical model to data from a cell proliferation assay can provide quantitative insight into the underlying mechanisms, by, for example, estimating the cell proliferation rate (Tremel et al., 2009; Sengers et al., 2007). A standard approach to modelling a cell proliferation assay is to use a mean-field model, which is equivalent to assuming that individuals within the population interact in proportion to the average population density and that there is no spatial structure, such as clustering, present (Tremel et al., 2009; Sengers et al., 2007; Maini et al., 2004b; Sarapata and de Pillis, 2014; Sherratt and Murray, 1990). More recently, increased computational power has meant that individual based models (IBMs) have been used to directly model the cell-level behaviour (Binny et al., 2016a; Frascoli et al., 2013; Johnston et al., 2014). IBMs are attractive for modelling biological phenomena because they can be used to represent properties of individual agents, such as cells, in the system of interest (Binny et al., 2016a,b; Frascoli et al., 2013; Peirce et al., 2004; Read et al., 2012; Treloar et al., 2013). Typical IBMs use a lattice, meaning that both the position of agents, and the direction of movement, are restricted (Codling et al., 2008). In contrast, lattice-free IBMs are more realistic because they enable agents to move in continuous space, in any direction. However, this extra freedom comes at the cost of higher computational requirements (Plank and Simpson, 2012).

In this work we consider a continuous-space, continuous-time IBM (Binny et al., 2016b). This IBM is well-suited to studying experimental data from a cell proliferation assay with PC-3 prostate cancer cells (Kaighn et al., 1979), as shown in Figure 1(a)-(d). The key mechanisms in the experiments include cell migration and cell proliferation, and we note that there is no cell death in the experiments on the time scales that we consider. Therefore, agents in the IBM are allowed to undergo both proliferation and movement events. Crowding effects that are often observed in two-dimensional

29 cell biology experiments (Cai et al., 2007) are explicitly incorporated into the IBM as the rates of  
30 proliferation and movement in the model are inhibited in regions of high agent density. In this study  
31 we specifically choose to work with the PC-3 cell line because these cells are known to be highly  
32 migratory, mesenchymal cells (Kaighn et al., 1979). This means that cell-to-cell adhesion is minimal  
33 for this cell line, and cells tend to migrate as individuals. We prefer to work with a continuous-space,  
34 lattice-free IBM as this framework gives us the freedom to identically replicate the initial location  
35 of all cells in the experimental data when we specify the initial condition in the IBM. In addition,  
36 lattice-free IBMs do not restrict the direction of movement like a lattice-based approach.

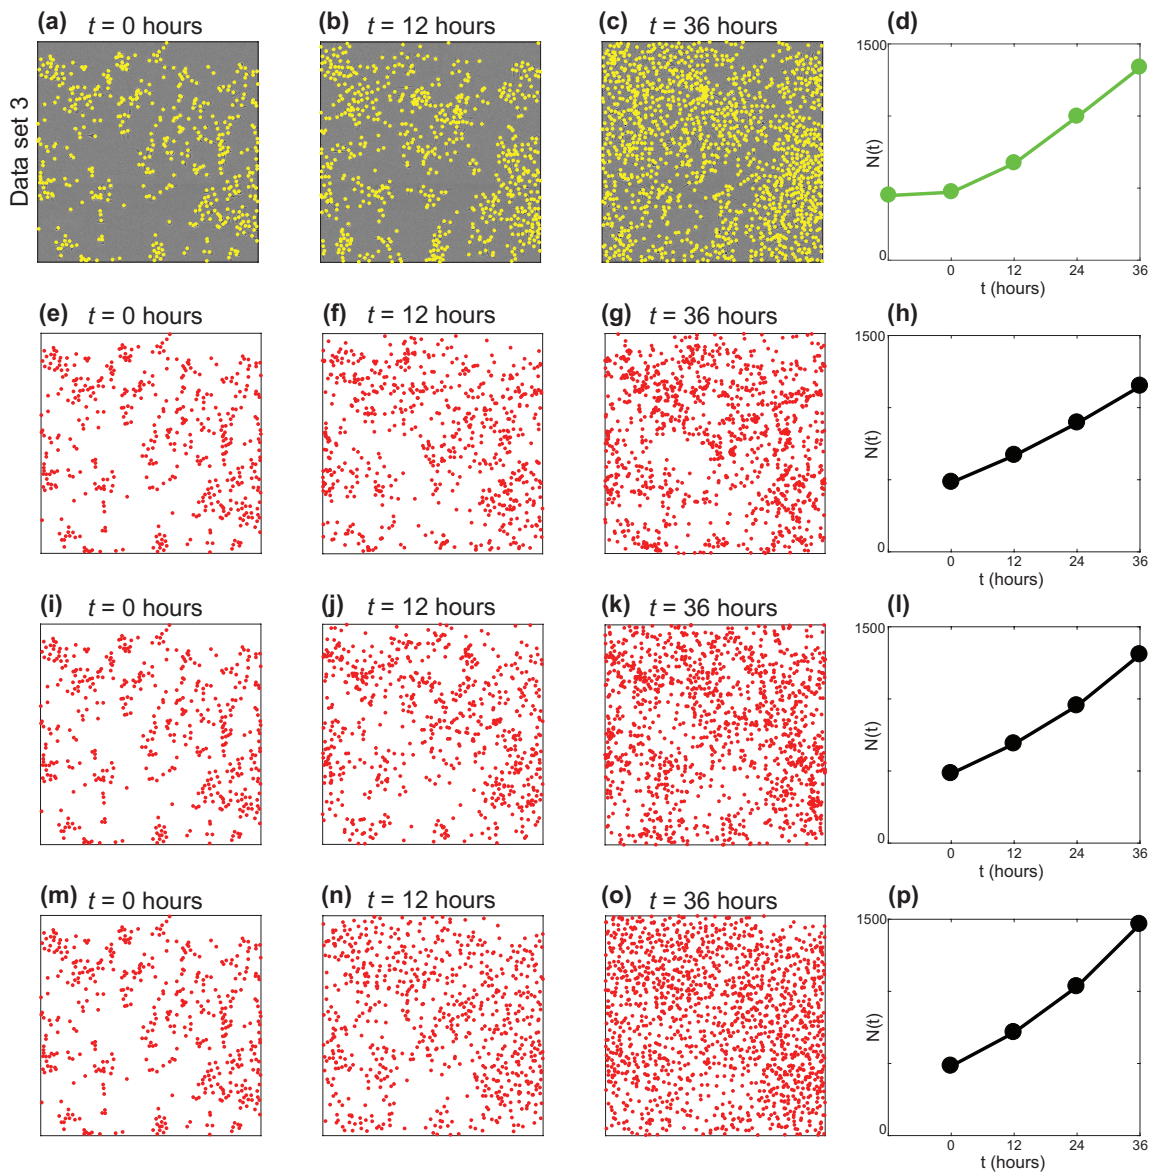

**Fig. 1:** (a)-(c) Experimental data set 3 at  $t = 0, 12$  and  $36$  hours. The position of each cell is identified with a yellow marker. The field of view is a square of length  $1440 \mu\text{m}$ . (d) Population size,  $N(t)$  for experimental data set 3. (e)-(h) One realisation of the IBM with  $\gamma_b = 0 \mu\text{m}$ , leading to an overly clustered distribution of agents. (i)-(l) One realisation of the IBM with  $\gamma_b = 4 \mu\text{m}$ , leading to a distribution of agents with similar clustering to the experimental data. (m)-(p) One realisation of the IBM with  $\gamma_b = 20 \mu\text{m}$ , leading to an overly segregated distribution of agents. All IBM simulations are initiated using the same distribution of agents as in (a), with  $m = 0.56$  /hour,  $p = 0.041$  /hour, and  $\sigma = 24 \mu\text{m}$ .

37 A key contribution of this study is to demonstrate how the IBM can be calibrated to experimental  
38 data. In particular, we use approximate Bayesian computation (ABC) to infer the parameters in  
39 the IBM. Four sets of experimental images (Supplementary material 1), each corresponding to an  
40 identically-prepared proliferation assay, are considered. The experiments were conducted over a  
41 duration of 48 hours, which is unusual because proliferation assays are typically conducted for no  
42 more than 24 hours (Browning et al.,2017). Data from the first three sets of experiments (Figure  
43 2) are used to calibrate the IBM and data from the fourth set of images is used to examine the  
44 predictive capability of the calibrated IBM. The IBM that we work with was presented very recently  
45 (Binny et al., 2016b). The description of the IBM by Binny et al. (2016b) involves a discussion of  
46 the mechanisms in the model and the derivation of a spatial moment continuum description (Binny  
47 et al.,2016b). IBMs are rarely calibrated to experimental data, and our current work is the first time  
48 experimental data has been used to provide parameter estimates for the new IBM.

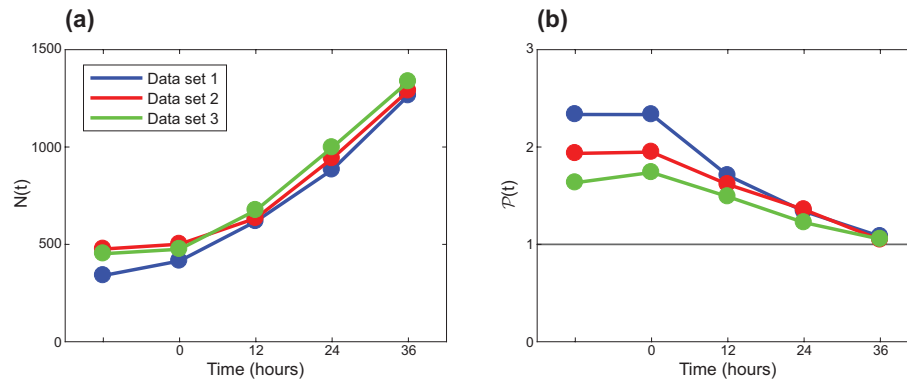

**Fig. 2:** Summary statistics for experimental data sets 1, 2 and 3, shown in blue, red and green, respectively. (a) Population size,  $N(t)$ . (b) Pair correlation,  $\mathcal{P}(t)$ . Unprocessed experimental data are given in Supplementary material documents 1 and 2.

49 Taking a Bayesian approach, we assume that cell proliferation assays are stochastic processes,  
50 and model parameters are random variables, allowing us to update information about the model  
51 parameters using ABC (Collis et al., 2017; Tanaka et al., 2006). For this purpose we perform a large  
52 number of IBM simulations using parameters sampled from a prior distribution. Previous work,  
53 based on mean-field models, suggests that the proliferation rate and cell diffusivity for PC-3 cells is  
54  $\lambda \approx 0.05$  /hour and  $D \approx 175 \mu\text{m}^2/\text{hour}$ , respectively (Johnston et al., 2015). The prior distribution  
55 for the IBM parameters are taken to be uniform and to encompass these previous estimates. We  
56 generate  $10^6$  realisations of the IBM using parameters sampled from the prior distribution, and accept  
57 1% of simulations that provide the best match to the experimental data. Our approach to connect  
58 the experimental data and the IBM is novel, we are unaware of any previous work that has used  
59 ABC to parameterise a lattice-free IBM of a cell proliferation assay.

60 Applying the ABC algorithm to data from three sets of identically prepared experiments leads to  
61 three similar posterior distributions. This result provides confidence that the IBM is a realistic rep-  
62 resentation of the cell proliferation assays and leads us to produce a combined posterior distribution  
63 from which we use the mode to give point estimates of the model parameters. To provide further  
64 validation of the IBM, we use the combined posterior distribution and the IBM to make a predic-  
65 tion of the fourth experimental data set. Simulating the IBM with parameters sampled from the  
66 combined posterior distribution allows us to predict both the time evolution of the population size,  
67  $N(t)$ , and the pair correlation within a small neighbourhood of radius  $50 \mu\text{m}$ ,  $\mathcal{P}(t)$ , which provides a  
68 measure of spatial structure. These results indicate that the *in silico* predictions are consistent with  
69 the experimental observations.

70 This manuscript is organised as follows. Sections 2.1-2.2 describe the experiments and the IBM,  
71 respectively. In Section 2.3 we explain how to apply the ABC algorithm to estimate the IBM pa-  
72 rameters. In Section 3 we present the marginal posterior distributions of the IBM parameters using  
73 data from the first three sets of experiments. The predictive power of the calibrated IBM is demon-  
74 strated by using the combined marginal posterior distributions to predict the fourth experimental  
75 data set. The predictive power of the calibrated IBM is compared with the standard mean-field lo-  
76 gistic equation (Murray, 2002). While both models can accurately predict  $N(t)$ , the logistic equation

77 provides no information about the spatial structure in the experimental data. Finally, in Section 4,  
78 we conclude and summarise opportunities for further research.

## 79 **2. Material and methods**

### 80 *2.1. Experimental methods*

81 We perform a series of proliferation assays using the IncuCyte ZOOM™ live cell imaging sys-  
82 tem (Essen BioScience, MI USA) (Jin et al., 2017). All experiments are performed using the PC-3  
83 prostate cancer cell line (Kaighn et al., 1979). These cells, originally purchased from American Type  
84 Culture Collection (Manassas, VA, USA), are a gift from Lisa Chopin (April, 2016). The cell line is  
85 used according to the National Health and Medical Research Council (NHMRC) National statement  
86 on ethical conduct in human research with ethics approval for the QUT Human Research Ethics  
87 Committee (QUT HREC 59644, Chopin). Cells are propagated in RPMI 1640 medium (Life Tech-  
88 nologies, Australia) with 10% foetal calf serum (Sigma-Aldrich, Australia), 100 U/mL penicillin,  
89 and 100  $\mu\text{g}/\text{mL}$  streptomycin (Life Technologies), in plastic tissue culture flasks (Corning Life Sci-  
90 ences, Asia Pacific). Cells are cultured in 5%  $\text{CO}_2$  and 95% air in a Panasonic incubator (VWR  
91 International) at 37 °C. Cells are regularly screened for *Mycoplasma*.

92 Approximately 8,000 cells are distributed in the wells of the tissue culture plate as uniformly  
93 as possible. After seeding, cells are grown overnight to allow for attachment and some subsequent  
94 growth. The plate is placed into the IncuCyte ZOOM™ apparatus, and images showing a field of  
95 view of size  $1440 \times 1440 \mu\text{m}$  are recorded every 12 hours for a total duration of 48 hours. An example  
96 of a set of experimental images is shown in Figure 1(a)-(c), while images from the other three data  
97 sets are provided in Supplementary material 1.

98 Experimental images are recorded at five time points, at intervals of 12 hours, giving  $t' =$   
99 0, 12, 24, 36 and 48 hours. Comparing the evolution of  $N(t')$  in Figure 2(a) shows the number of  
100 cells in some experiments do not increase appreciably during the first 12 hours. This suggests that  
101 the cells may experience a settling phase, so some time is required for the cells to commence normal  
102 proliferation (Tremel et al., 2009; Jin et al., 2017). Therefore, we treat the image at  $t' = 12$  hours  
103 as the first image after the settling phase, and shift time,  $t = t' - 12$  hours. Therefore, excluding



104 the first experimental image at  $t' = 0$  hours, we have images recorded at four time points after the  
105 settling time,  $t = 0, 12, 24$  and  $36$  hours.

## 106 2.2. Mathematical model

### 107 2.2.1. Individual based model

108 We consider an IBM describing the proliferation and movement of individual cells (Binny et al., 2016a,b).  
109 Since cell death is not observed in the experiments, the IBM does not include agent death. The IBM  
110 allows the net proliferation rate and the net movement rate of agents to depend on the spatial  
111 arrangement of other agents. To be consistent with previous experimental observations, the IBM  
112 incorporates a biased movement mechanism so that agents tend to move away from nearby crowded  
113 regions (Cai et al., 2007). We use the IBM to describe the dynamics of a population of agents  
114 on a square domain of length  $L = 1440 \mu\text{m}$  to match the field-of-view of the experimental data  
115 (Figure 1(a)-(c)). Agents in the model are treated as a series of points which we may interpret  
116 as a population of uniformly-sized discs with diameter  $\sigma = 24 \mu\text{m}$  (Supplementary material 1).  
117 Each agent has location  $\mathbf{x}_n = (x_1, x_2)$ , for  $n = 1, \dots, N(t)$ . Since the field-of-view of each image  
118 is much smaller than the size of the well in the tissue culture plate, we apply periodic boundary  
119 conditions [16].

120 Proliferation and movement events occur according to a Poisson process over time (Binny et al., 2016b).  
121 The  $n$ th agent is associated with neighbourhood-dependent rates,  $P_n \geq 0$  and  $M_n \geq 0$ , of prolifer-  
122 ation and movement, respectively. These rates consist of intrinsic components,  $p > 0$  and  $m > 0$ ,  
123 respectively. Crowding effects are introduced by reducing the intrinsic rates by a contribution from  
124 other neighbouring agents. These crowding effects are calculated using a kernel,  $w^{(\cdot)}(r)$ , that depends  
125 on the separation distance,  $r \geq 0$ , so that

$$P_n = \max \left( 0, p - \sum_{i \neq n}^{N(t)} w^{(p)}(r) \right), \quad (1)$$

$$M_n = \max \left( 0, m - \sum_{i \neq n}^{N(t)} w^{(m)}(r) \right). \quad (2)$$

126 Following Binny et al.,(2016), we specify the kernels to be Gaussian with width corresponding to the

127 cell diameter,  $\sigma$ , giving

$$w^{(p)}(r) = \gamma_p \exp\left(-\frac{r^2}{2\sigma^2}\right), \quad (3)$$

$$w^{(m)}(r) = \gamma_m \exp\left(-\frac{r^2}{2\sigma^2}\right). \quad (4)$$

128 Here,  $\gamma_p$  is the value of  $w^{(p)}(0)$  and  $\gamma_m$  is the value of  $w^{(m)}(0)$ . These parameters provide a measure  
129 of the strength of crowding effects on agent proliferation and movement, respectively. The kernels,  
130  $w^{(p)}(r)$  and  $w^{(m)}(r)$ , ensure that the interactions between pairs of agents separated by more than  
131 roughly 2-3 cell diameters lead to a negligible contribution. For computational efficiency, we truncate  
132 the Gaussian kernels so that  $w^{(p)}(r) = w^{(m)}(r) = 0$ , for  $r \geq 3\sigma$  (Law et al., 2003).

133 To reduce the number of unknown parameters in the IBM, we specify  $\gamma_p$  and  $\gamma_m$  by invoking an  
134 assumption about the maximum packing density of the population. Here we suppose that the net  
135 proliferation and net movement rates reduce to zero when the agents are packed at the maximum  
136 possible density, which is a hexagonal packing (Figure 3(a)). For interactions felt between the nearest  
137 neighbours only (Figure 3(b)), we obtain

$$\gamma_p = \frac{p}{6} \exp\left(\frac{1}{2}\right), \quad (5)$$

$$\gamma_m = \frac{m}{6} \exp\left(\frac{1}{2}\right), \quad (6)$$

138 which effectively specifies a relationship between  $\gamma_p$  and  $p$ , and between  $\gamma_m$  and  $m$ . Note that this  
139 assumption does not preclude a formation of agents in which some pairs have a separation of less  
140 than  $\sigma$  and densities greater than hexagonal packing, which can occur by chance.

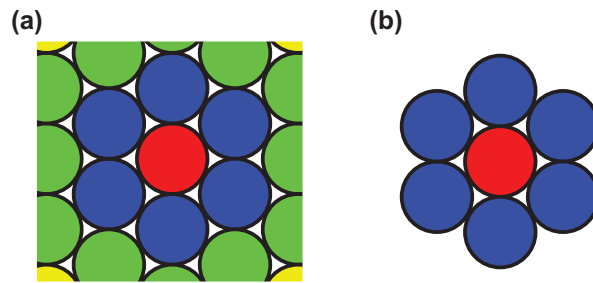

**Fig. 3:** (a) Hexagonal packing of uniformly sized discs. The focal agent (red) is surrounded by six nearest neighbouring agents (blue), and twelve next nearest neighbouring agents (green). (b) Hexagonal packing around a focal agent (red) showing the six nearest neighbours only.

141 When an agent at  $\mathbf{x}_n$  proliferates, the location of the daughter agent is selected by sampling  
142 from a bivariate normal distribution with mean  $\mathbf{x}_n$  and variance  $\sigma^2$  (Binny et al., 2016b). Since  
143 mesenchymal cells in two-dimensional cell culture are known to move with a directional movement  
144 bias away from regions of high density (Cai et al., 2007), we allow the model to incorporate a bias  
145 so that the preferred direction of movement is in the direction of decreasing agent density. For  
146 simplicity, the distance that each agent steps is taken to be a constant, equal to the cell diameter,  $\sigma$   
147 (Plank and Simpson, 2012).

148 To choose the movement direction, we use a crowding surface,  $B(\mathbf{x})$ , to measure the local crowd-  
149 edness at location  $\mathbf{x}$ , given by

$$B(\mathbf{x}) = \sum_{i=1}^{N(t)} w^{(b)}(\|\mathbf{x} - \mathbf{x}_i\|). \quad (7)$$

150 The crowding surface is the sum of contributions from every agent, given by a bias kernel,  $w^{(b)}(r)$ .  
151 The contributions depend on the distance between  $\mathbf{x}$  and the location of the  $i$ th agent,  $\mathbf{x}_i$ , given by  
152  $r = \|\mathbf{x} - \mathbf{x}_i\|$ . Again, we choose  $w^{(b)}$  to be Gaussian, with width equal to the cell diameter, and  
153 repulsive strength,  $\gamma_b \geq 0$ , so that

$$w^{(b)}(r) = \gamma_b \exp\left(-\frac{r^2}{2\sigma^2}\right), \quad (8)$$

154 where  $\gamma_b$  is value of  $w^{(b)}(0)$ , and has dimensions of length. Note that  $B(\mathbf{x})$  is an increasing function  
155 of local density, and approaches zero as the local density decreases. A typical crowding surface is  
156 shown in Figure 4(b) for the arrangement of agents in Figure 4(a).

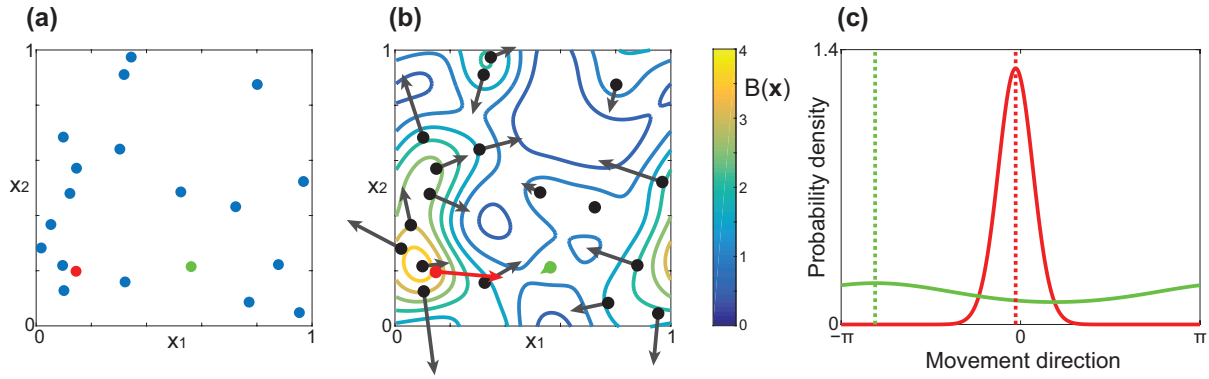

**Fig. 4:** (a) Example distribution of agents on a  $1 \times 1$  periodic domain. (b) Level curves of the corresponding crowding surface,  $B(\mathbf{x})$ , for this arrangement of agents. The arrows show the preferred direction of movement,  $\mathbf{B}_n$ . To illustrate how the direction of movement is chosen, (c) shows the probability density of the von Mises distribution for the red and green agents highlighted in (a) and (b). The preferred direction,  $\arg(\mathbf{B}_n)$ , is shown as dotted vertical lines for both agents. The red agent is in a crowded region so  $\|\mathbf{B}_n\|$  is large, meaning that the agent is likely to move in the preferred direction  $\arg(\mathbf{B}_n)$ . The green agent is in a low density region and  $\|\mathbf{B}_n\|$  is small, meaning that the bias is very weak and the agent's direction of movement is almost uniformly distributed. To illustrate the effects of the crowding surface as clearly as possible, we set  $\gamma_b = 1$ ,  $\sigma = 0.1$ ,  $L = 1$  in this schematic figure to draw attention to the gradient of the crowding surface.

157 To determine the direction of movement we use the shape of  $B(\mathbf{x})$  to specify the bias, or preferred  
158 direction, of agent  $n$ ,  $\mathbf{B}_n$ , given by

$$\mathbf{B}_n = -\nabla B(\mathbf{x}_n), \quad (9)$$

159 which gives the magnitude and direction of steepest descent. Results in Figure 4(b) show  $\mathbf{B}_n$  for  
160 the arrangement of agents in Figure 4(a). To determine the direction of movement, we consider  
161 the magnitude and direction of  $\mathbf{B}_n$ , and sample the actual movement direction from a von Mises  
162 distribution,  $\text{von Mises}(\arg(\mathbf{B}_n), \|\mathbf{B}_n\|)$  (Binny et al., 2016b; Forbes et al., 2011). Therefore, agents  
163 are always most likely to move in the direction of  $\mathbf{B}_n$ , however as  $\|\mathbf{B}_n\| \rightarrow 0$ , the preferred direction  
164 becomes uniformly distributed.

165 To illustrate how the direction of movement is chosen, we show, in Figure 4(b), the bias vector  
166 for each agent,  $\mathbf{B}_n$ . Note that  $\mathbf{B}_n$  does not specify the movement step length, and the direction of  $\mathbf{B}_n$   
167 does not necessarily specify the actual direction. Rather,  $\arg(\mathbf{B}_n)$  specifies the preferred direction.  
168 To illustrate this property, we highlight two agents in Figure 4(a). The red agent is located on a  
169 relatively steep part of the crowding surface, so  $\|\mathbf{B}_n\|$  is large. The green agent is located on a  
170 relatively flat part of the crowding surface, so  $\|\mathbf{B}_n\|$  is close to zero. Figure 4(c) shows the von Mises  
171 distributions for the red and green agent. Comparing these movement distributions confirms that  
172 the crowded red agent is more likely to move in the direction of  $\mathbf{B}_n$ . The bias is weak for the green  
173 agent, so the direction of movement is almost uniformly distributed since  $\|\mathbf{B}_n\|$  is smaller.

174 IBM simulations are performed using the Gillespie algorithm (Gillespie, 1977). To initialise each  
175 simulation we specify the initial number and initial location of agents to match to the experimental  
176 images at  $t = 0$  hours (Supplementary material 1) for experimental data sets 1, 2, 3 and 4. In all  
177 simulations we set  $\sigma = 24 \mu\text{m}$  and  $L = 1440 \mu\text{m}$ . The remaining three parameters,  $m$ ,  $p$  and  $\gamma_b$ , are  
178 varied with the aim of producing posterior distributions using a Bayesian framework.

179 If  $\gamma_m = \gamma_b = 0$ , and the variance of the dispersal distribution is large, the IBM corresponds  
180 to logistic growth (Binny et al., 2016b, Browning et al. 2017). Under these simplified conditions, a  
181 uniformly distributed initial population of agents will grow, at rate  $p$ , to eventually reach a uniformly  
182 distributed maximum average density of  $p/(2\pi\gamma_p\sigma_p^2)$ . We do not consider this case here as our initial  
183 distribution of cells in the experiments is clustered, and so the logistic growth model is, strictly

184 speaking, not valid (Binny et al., 2016b).

### 185 2.2.2. Summary statistics

186 To match the IBM simulations with the experimental data we use properties that are related  
187 to the first two spatial moments (Law et al., 2003). The first spatial moment, the average density,  
188 is characterised by the number of agents in the population,  $N(t)$ . The second spatial moment  
189 characterises how agents are spatially distributed, and is often reported in terms of a pair correlation  
190 function (Binny et al., 2016a,b; Law et al., 2003). In this work we consider the pair correlation within  
191 a distance of  $\delta r$ , given by

$$\mathcal{P}(t) = \frac{L^2 \sum_{i=1}^{N(t)} \sum_{\substack{j=1 \\ j \neq i}}^{N(t)} \mathbb{I}_{\|\mathbf{x}_i - \mathbf{x}_j\| \leq \delta r}}{N(t)^2 \pi \delta r^2}, \quad (10)$$

192 where  $\mathbb{I}$  is an indicator function so that the double sum in Equation (10) gives twice the number of  
193 distinct pairs within a distance  $\delta r$ , which we set to be  $50 \mu\text{m}$ . Therefore,  $\mathcal{P}(t)$  is the ratio of the  
194 number of pairs of agents, separated by a distance of less than  $50 \mu\text{m}$ , to the expected number of  
195 pairs of agents separated by a distance of less than  $50 \mu\text{m}$ , if the agents were randomly distributed.  
196 This means that,  $\mathcal{P}(t) = 1$  corresponds to randomly placed agents;  $\mathcal{P}(t) > 1$  corresponds to a locally  
197 clustered distribution; and,  $\mathcal{P}(t) < 1$  corresponds to a locally segregated distribution.

### 198 2.3. Approximate Bayesian computation

199 We consider  $m$ ,  $p$  and  $\gamma_b$  as random variables, and the uncertainty in these parameters is updated  
200 using observed data (Collis et al., 2017; Tanaka et al., 2006). To keep the description of the inference  
201 algorithm succinct, we refer to the unknown parameters as  $\Theta = \langle m, p, \gamma_b \rangle$ .

202 In the absence of any experimental observations, information about  $\Theta$  is characterised by specified  
203 prior distributions. The prior distributions are chosen to be uniform on an interval that is wide enough  
204 to encompass previous estimates of  $m$  and  $p$  (Johnston et al., 2015). To characterise the prior for  
205  $\gamma_b$ , we note that this parameter is related to a length scale over which bias interactions are felt.  
206 Preliminary results (not shown) use a prior in the interval  $0 \leq \gamma_b \leq 20 \mu\text{m}$  and suggest that a narrow  
207 prior in the interval  $0 \leq \gamma_b \leq 10 \mu\text{m}$  is appropriate. In summary, our prior distributions are uniform

208 and independent, given by

$$\pi(m) = U(0, 10) \text{ /hour}, \quad (11)$$

$$\pi(p) = U(0, 0.1) \text{ /hour}, \quad (12)$$

$$\pi(\gamma_b) = U(0, 10) \mu\text{m}. \quad (13)$$

209 We always summarise data,  $\mathbf{X}$ , with a lower-dimensional summary statistic,  $S$ . Data and summary  
 210 statistics from the experimental images are denoted  $\mathbf{X}_{\text{obs}}$  and  $S_{\text{obs}}$ , respectively. Similarly, data  
 211 and summary statistics from IBM simulations are denoted  $\mathbf{X}_{\text{sim}}$  and  $S_{\text{sim}}$ , respectively. Information  
 212 from the prior is updated by the likelihood of the observations,  $\pi(S_{\text{obs}}|\Theta)$ , to produce posterior  
 213 distributions,  $\pi(\Theta|S_{\text{obs}})$ . We employ the most fundamental ABC algorithm, known as ABC rejection  
 214 (Liepe et al., 2014; Tanaka et al., 2006), to sample from the approximate posterior distribution. The  
 215 approximate posterior distributions are denoted  $\pi_u(\Theta|S_{\text{obs}})$ .

216 In this work we use a summary statistic that is a combination of  $N(t)$  and  $\mathcal{P}(t)$  at equally spaced  
 217 intervals of duration 12 hours. A discrepancy measure,  $\rho(S_{\text{obs}}, S_{\text{sim}})$ , is used to assess the closeness  
 218 of  $S_{\text{obs}}$  and  $S_{\text{sim}}$ ,

$$\rho(S_{\text{obs}}, S_{\text{sim}}) = \sum_{j=1}^3 \left( \frac{[N_{\text{sim}}(12j) - N_{\text{obs}}(12j)]^2}{N_{\text{obs}}(12j)^2} + \frac{[\mathcal{P}_{\text{sim}}(12j) - \mathcal{P}_{\text{obs}}(12j)]^2}{\mathcal{P}_{\text{obs}}(12j)^2} \right). \quad (14)$$

219 Algorithm 1 is used to obtain  $10^6 u$  samples,  $\{\Theta_i\}_{i=1}^{10^6 u}$ , from the approximate joint posterior  
 220 distribution,  $\pi_u(\Theta|S_{\text{obs}})$ , for each data set. Here,  $u \ll 1$  is the accepted proportion of samples.

---

**Algorithm 1** ABC rejection sampling algorithm to obtain  $10^6 u$  samples from the approximate posterior distribution,  $\pi_u(\Theta|S_{\text{obs}})$ .

---

- 1: Set  $\sigma = 24 \mu\text{m}$ ,  $L = 1440 \mu\text{m}$ , and set  $\mathbf{x}_n$  to match experimental data  $\mathbf{X}_{\text{obs}}$  at  $t = 0$ .
  - 2: Draw parameter samples from the prior  $\Theta_i \sim \pi(\Theta)$ .
  - 3: Simulate cell proliferation assay with  $\Theta_i$  and  $t \leq 36$  hours.
  - 4: Record summary statistic  $S_{\text{sim}_i} = \{N_{\text{sim}}(12j), \mathcal{P}(12j)\}_{j=1}^3$ , where  $j$  is an index that denotes the three observation time points,  $t = 12, 24$  and  $36$  hours.
  - 5: Compute the discrepancy measure  $\epsilon_i = \rho(S_{\text{obs}}, S_{\text{sim}_i})$ , given in Equation 14.
  - 6: Repeat steps 2-5 until  $10^6$  samples  $\{\Theta_i, \epsilon_i\}_{i=1}^{10^6}$  are simulated.
  - 7: Order  $\{\Theta_i, \epsilon_i\}_{i=1}^{10^6}$  by  $\epsilon_i$  such that  $\epsilon_1 < \epsilon_2 < \dots$
  - 8: Retain the first 1% ( $u = 0.01$ ) of prior samples  $\Theta_i$ , as posterior samples,  $\{\Theta_i\}_{i=1}^{10^6 u}$ .
-



221 To present and perform calculations with posterior samples, we use a kernel density estimate to  
222 form approximate marginal posterior distributions, for each parameter, and each data set using the  
223 `ksdensity` function in MATLAB (Math- works, 2017). This is done by treating the components  
224 of the joint posterior samples as samples from each marginal distribution. The `ksdensity` function  
225 gives a discrete distribution for each marginal posterior, with grid spacing  $\Delta m = 0.01$ ,  $\Delta p = 0.0001$   
226 and  $\Delta \gamma_b = 0.01$ , for  $m$ ,  $p$  and  $\gamma_b$ , respectively. This discretisation ensures that the marginal posterior  
227 densities are approximated using 1000 equally spaced values across the prior support.

### 228 *2.3.1. Generating and sampling from the combined posterior distribution*

229 The marginal posterior distributions for each parameter are similar for each independent exper-  
230 imental data set. Therefore, we combine the marginal posterior distributions for each independent  
231 experimental data set to obtain a combined posterior distribution. If the approximate marginal pos-  
232 terior distribution for  $m$  is  $\pi_u(m|S_{\text{obs}}^{(k)})$ , where  $S_{\text{obs}}^{(k)}$  is the summary statistic from the  $k$ th experimental  
233 data set, then the combined marginal posterior distribution for  $m$  is

$$\pi_u(m|\{S_{\text{obs}}^{(k)}\}_{k=1}^3) \propto \prod_{k=1}^3 \pi_u(m|S_{\text{obs}}^{(k)}). \quad (15)$$

234 Combined marginal posterior distributions for  $p$  and  $\gamma_b$  are calculated similarly.

235 To test the predictive power of the calibrated IBM, we sample parameters from the combined  
236 joint posterior distribution by sampling each parameter separately from the corresponding combined  
237 marginal posterior distributions. This approach amounts to assuming that  $m$ ,  $p$  and  $\gamma_b$  are inde-  
238 pendent random variables, and we will make a comment on the validity of this assumption later.  
239 For  $m$ , we generate a discrete combined posterior distribution,  $\pi_u(m|\{S_{\text{obs}}^{(k)}\}_{k=1}^3)$ , using the kernel-  
240 density estimate for each data set and Equation (15). This gives a discrete distribution with bin  
241 width  $\Delta m = 0.01$ , where each bin is denoted by an index,  $l = 0, 1, \dots$ , and has probability density  
242  $\pi_u(l\Delta m|\{S_{\text{obs}}^{(k)}\}_{k=1}^3)$ . If  $m$  is uniformly distributed within each bin, we apply Algorithm 2 to obtain  
243  $10^4$  samples. Repeating this process in a similar way to gives  $10^4$  samples for both  $p$  and  $\gamma_b$ .

---

**Algorithm 2** Rejection sampling algorithm for sampling from the combined approximate posterior distribution,  $\pi_u(m|\{S_{\text{obs}}^{(k)}\}_{k=1}^3)$ .

---

- 1: Set  $\Delta m = 0.01$ ,  $m_{\text{max}} = 10$ , which is the upper limit of the prior support.
  - 2: Set maximum density  $\nu = \max \pi_u(m|\{S_{\text{obs}}^{(k)}\}_{k=1}^3)$ .
  - 3: Sample proposal bin index  $l_*$  from  $\{0, \dots, m_{\text{max}}/\Delta m - 1\}$ .
  - 4: Sample  $r_1 \sim U(0, \nu)$ .
  - 5: If  $r_1 < \pi_u(l_*\Delta m; \{S_{\text{obs}}^{(k)}\}_{k=1}^3)$ , accept  $l_*$ , else repeat steps 3-5.
  - 6: Sample the location within the chosen bin,  $m_i \sim U(l_*\Delta m, (l_* + 1)\Delta m)$ .
  - 7: Repeat steps 3-6 until  $10^4$  samples,  $\{m_i\}_{i=1}^{10^4}$ , are obtained.
- 

244 *2.3.2. Predicting experimental data set 4 using the combined posterior distribution*

245 We sample  $10^4$  parameter sets,  $\{\Theta_i\}_{i=1}^{10^4}$ , from the combined posterior distribution,  
246  $\pi_u(\Theta|\{S_{\text{obs}}^{(k)}\}_{k=1}^3)$ . Using these samples, we simulate the IBM initialised with the actual initial ar-  
247 rangement of cells in data set 4 at  $t = 0$ . For each parameter combination  $S_{\text{sim}}$  is recorded at 12 hour  
248 intervals, and used to construct distributions of  $N(t)$  and  $\mathcal{P}(t)$ . These distributions are represented  
249 as box plots and compared with summary statistics from experimental data set 4.

250 **3. Results and discussion**

251 To qualitatively illustrate the importance of spatial structure we show, in rows 2-4 of Figure 1,  
252 snapshots from the IBM with different choices of parameters. In each case the IBM simulations  
253 evolve from the initial condition specified in Figure 1(a). Results in the right-most column of Figure  
254 1 compare the evolution of  $N(t)$  and we see that the parameter combination in the second row  
255 underestimates  $N(t)$ , the parameter combination in the fourth row overestimates  $N(t)$ , and the  
256 parameter combination in the third row produces a reasonable match to the experimental data. A  
257 visual comparison of the spatial arrangement of agents in rows 2-4 of Figure 1 suggests that these  
258 different parameter combinations may lead to different spatial structures. This illustration of how  
259 the IBM results vary with the choice of parameters motivates us to use ABC rejection to estimate the  
260 joint distribution of the parameters. To do this we will use summary statistics from three identically  
261 prepared, independent sets of experiments. The summary statistics for these experiments,  $N(t)$  and  
262  $\mathcal{P}(t)$ , are summarised in Figure 2, and tabulated in Supplementary material 1.

263 The approximate marginal posterior distributions for  $m$ ,  $p$  and  $\gamma_b$  are shown in Figure 5(a)-(c),  
264 respectively, for experimental data sets 1, 2 and 3. There are several points of interest to note. In

265 each case, the posterior support is well within the interior of the prior support, suggesting that our  
266 choice of priors is appropriate. An interesting feature of the marginal posterior distributions for all  
267 parameters is that there is significant overlap for each independent experimental data set. There is  
268 some variation in the mode between experimental data sets, for each parameter, which is expected  
269 under the assumption that cell proliferation assays are stochastic processes.

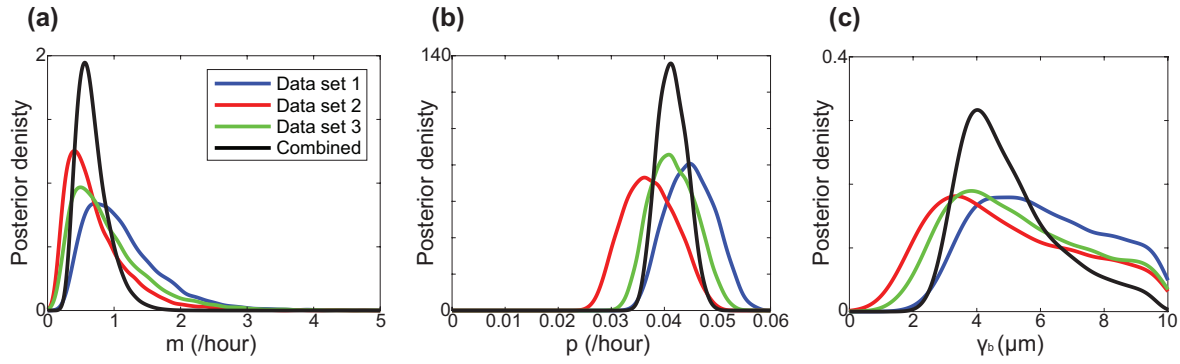

**Fig. 5:** (a)-(c) Kernel-density estimates of the approximate marginal posterior distributions for each data set, for parameters  $m$ ,  $p$  and  $\gamma_b$ , respectively, with  $u = 0.01$ . The combined posterior distribution (black), given by Equation (15), is superimposed. The modes of the combined marginal posterior distributions are  $m = 0.56$  /hour,  $p = 0.041$  /hour and  $\gamma_b = 4.0$   $\mu\text{m}$ . All distributions are scaled so that the area under the curve is unity.

270 Since the marginal posterior distributions for each experimental data set overlap, we produce a  
271 combined marginal posterior distribution for each parameter using Equation (15). The combined  
272 marginal posterior distributions are superimposed, and the mode is given by 0.56 /hour, 0.041 /hour  
273 and 4.0  $\mu\text{m}$  for  $m$ ,  $p$  and  $\gamma_b$ , respectively. These estimates of  $p$  and  $m$  give a cell doubling time of  
274  $\ln(2)/p \approx 17$  hours, and a cell diffusivity of approximately 320  $\mu\text{m}^2/\text{hour}$ , which are typical values  
275 for PC-3 cells at low density [18, 15]. All results in the main document correspond to retaining the  
276 top 1% of samples ( $u = 0.01$ ) and additional results (Supplementary material 1) confirm that the  
277 results are relatively insensitive to this choice.

278 To assess the predictive power of the calibrated IBM, we attempt to predict the time evolution  
279 of a separate, independently collected data set, experimental data set 4, as shown in Figure 6(a)-(d).  
280 We use the mode of the combined posterior distribution and the initial arrangement of agents in  
281 experimental data set 4 to produce a typical prediction in Figure 6(e)-(h). Visual comparison of  
282 the experimental data and the IBM prediction suggests that the IBM predicts a similar number of  
283 agents, and a similar spatial structure, with some clustering present. To quantify our results, we  
284 compare the evolution of  $N(t)$  in Figure 6(i) which reveals an excellent match. Furthermore, we  
285 predict the evolution of  $\mathcal{P}(t)$  in Figure 6(j) confirming similar trends. The quality of match between  
286 the predicted distribution of  $N(t)$  and  $\mathcal{P}(t)$  supports our assumption that  $m$ ,  $p$  and  $\gamma_b$  can be treated  
287 as independent random variables as posited in Section 2.3. Although the predicted decay in  $\mathcal{P}(t)$  is  
288 not as rapid as in the experimental data. There are many potential explanations for this, including  
289 the choice of summary statistics, and assumption relating  $p$  and  $\gamma_p$ , and  $m$  and  $\gamma_m$ .

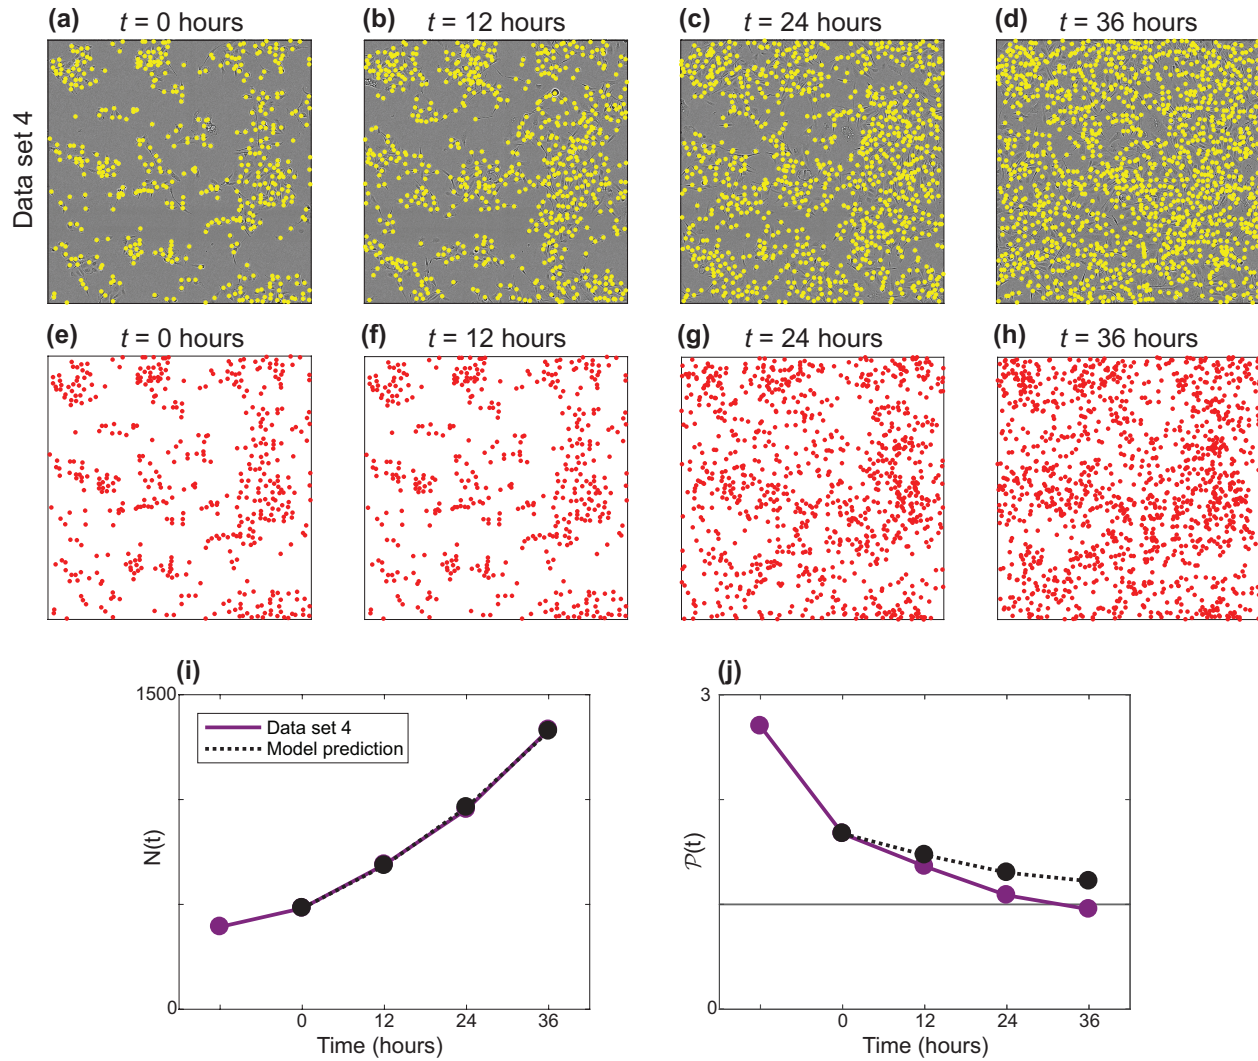

**Fig. 6:** (a)-(d) Experimental images for data set 4. The position of each cell is identified with a yellow marker. The field of view is a square of length  $1440 \mu\text{m}$ . (e)-(h) One realisation of the IBM with parameters corresponding to the posterior mode:  $m = 0.56$  /hour,  $p = 0.041$  /hour and  $\gamma_b = 4.0 \mu\text{m}$ , with the same initial arrangement of agents as in (a). (i)  $N(t)$  for the experimental data (purple) and the IBM prediction (dashed black). (j)  $\mathcal{P}(t)$  for the experimental data (purple) and the IBM prediction (dashed black).

290 In addition to examining a single, typical realisation of the calibrated model, we now examine a  
291 suite of realisations of the calibrated IBM, and compare results with experimental data set 4. The  
292 suite of IBM realisations is obtained by sampling from the joint posterior distribution. Results in  
293 Figure 7(a) compare  $N(t)$  from experimental data set 4 with distributions of  $N(t)$  from the suite of  
294 IBM simulations, showing an excellent match. The spread of the distributions of  $N(t)$  increases with  
295 time, which is expected. Results in Figure 7(b) compare the evolution of  $\mathcal{P}(t)$  from experimental  
296 data set 4 with distributions of  $\mathcal{P}(t)$  from the suite of IBM simulations, showing the predicted  
297 distributions of  $\mathcal{P}(t)$  overlap with the experimental data. Overall, the quality of the match between  
298 the prediction and the experimental data is high, as the prediction captures both qualitative and  
299 quantitative features of the data.

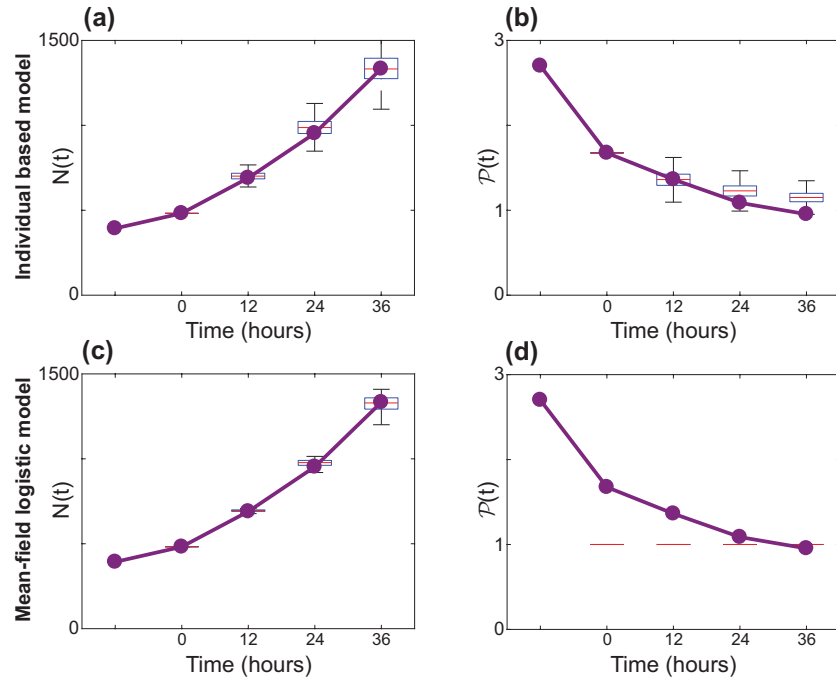

**Fig. 7:** (a)-(b) Predictive distributions for  $N(t)$  and  $\mathcal{P}(t)$ , respectively, generated using the IBM.  $10^4$  parameter samples were taken from the combined posterior distribution, and a model realisation produced for each sample, initiated as in Figure 6(a). Box plots show the distribution of  $N(t)$  and  $\mathcal{P}(t)$  across these realisations in (a) and (b), respectively. (c)-(d) Show the equivalent predictive distributions as box plots, using the same procedure for the mean-field logistic growth model. The procedure and kernel-density estimates of the marginal distributions for the mean-field logistic model are outlined in Supplementary material 1.



300 To illustrate the importance of considering spatial structure in the IBM, we also calibrate the  
301 solution of the classical mean-field logistic equation (Murray, 2002) to experimental data sets 1, 2  
302 and 3. The logistic equation is given by

$$\frac{dN(t)}{dt} = \lambda N(t) \left( 1 - \frac{N(t)}{N_{\max}} \right), \quad (16)$$

303 where  $\lambda$  is the cell proliferation rate and  $N_{\max}$  is the maximum number of agents (Murray, 2002;  
304 Jin et al., 2017). Following a similar procedure (Supplementary material 1), we use ABC rejection  
305 to form combined posterior distributions of  $\lambda$  and  $N_{\max}$ . The modes of the combined posterior  
306 distributions are  $\lambda = 0.036$  /hour and  $N_{\max} = 4017$ . This estimate leads to a doubling time of  
307 approximately 19 hours, which is slightly longer than the doubling time predicted using the calibrated  
308 IBM. We then examine a suite of solutions to Equation (16), where we sample from the joint posterior  
309 distribution for  $\lambda$  and  $N_{\max}$ . The predicted distribution of  $N(t)$  is compared with experimental data  
310 set 4 in Figure 7(c), revealing an excellent match. However, implicit in the logistic equation is the  
311 mean-field assumption, which amounts to ignoring spatial structure. Therefore, the logistic equation  
312 effectively predicts  $\mathcal{P}(t) = 1$  for all  $t > 0$ , which clearly is unable to match the spatial structure  
313 inherent in the experiments, as demonstrated in Figure 7(d). Overall, both calibrated models are  
314 able to predict the evolution of  $N(t)$  over 36 hours. However, the logistic model is unable to describe,  
315 or predict, any information relating to spatial structure in the arrangement of cells. The differences  
316 in the way that the logistic model and the IBM treat interactions between individuals could explain  
317 why the calibration process leads to different estimates of the low density cell proliferation rates,  $\lambda$   
318 and  $p$ . These differences affirm that the interactions between individuals at different spatial scales  
319 appear to be important for our experimental data.

## 320 4. Conclusions

321 In this work we explore how to connect a spatially continuous IBM of cell migration and cell prolif-  
322 eration to novel data from a cell proliferation assay. Previous work parameterising IBM models of cell  
323 migration and cell proliferation to experimental data using ABC have been restricted to lattice-based  
324 IBMs (Johnston et al., 2014). This is partly because ABC methods require large numbers of IBM

325 simulations, and lattice-based IBMs are far less computationally expensive than lattice-free IBMs  
326 (Plank and Simpson, 2012). We find it is preferable to work with a lattice-free IBM when dealing  
327 with experimental data as a lattice-based IBM requires approximations when mapping the distribu-  
328 tion of cells from experimental images to a lattice (Johnston et al., 2014; Johnston et al., 2016). This  
329 mapping can be problematic. For example, if multiple cells in an experimental image are equally  
330 close to one lattice site, ad hoc assumptions have to be introduced about how to arrange those cells  
331 on the lattice without any overlap. These issues are circumvented using a lattice-free method.

332 To help overcome the computational cost of using ABC with a lattice-free IBM, we introduce  
333 several realistic, simplifying assumptions. The IBM originally presented by Binny et al. (2016b)  
334 involves 12 free parameters, which is a relatively large number for standard inference techniques.  
335 The model is simplified by noting that our experiments do not involve cell death, and specifying the  
336 width of the interaction kernels to be constant, given by the cell diameter. Another simplification is  
337 given by assuming that crowding effects reduce the proliferation and movement rates to zero when  
338 the agents are packed at the maximum hexagonal packing density. This leads to a simplified model  
339 with three free parameters:  $m$ ,  $p$  and  $\gamma_b$ . Using ABC rejection, we arrive at posterior distributions for  
340 these parameters for three independent experimental data sets. The marginal posterior distributions  
341 for the three parameters are similar, leading us to combine the marginal posterior distributions. The  
342 mode of the combined posterior distributions for  $m$  and  $p$  are consistent with previous parameter  
343 estimates (Johnston et al., 2015) and the mode for  $\gamma_b$  is consistent with previous observations that  
344 mesenchymal cells in this kind of two-dimensional experiment tend to move away from regions of  
345 high cell density (Cai et al., 2007).

346 In the field of mathematical biology, questions about how much detail to include in a mathe-  
347 matical model, and what kind of mathematical model is preferable for understanding a particular  
348 biological process are often settled in an *ad hoc* manner, as discussed by Maclaren et al. (2015). Our  
349 approach in this work is to use a mathematical model that incorporates just the key mechanisms,  
350 with an appropriate number of unknown parameters. Other approaches are possible, such as using  
351 much more complicated mathematical models that describe additional mechanisms such as: (i) de-  
352 tailed information about the cell cycle in individual cells (Fletcher et al., 2012); (ii) concepts of leader

353 and follower cells (Kabla, 2012); (iii) explicitly coupling cell migration and cell proliferation to the  
354 availability of nutrients and growth factors (Tang at al., 2014); or (iv) including mechanical forces  
355 between cells (Stichel at al., 2017). However, we do not include these kinds of detailed mechanisms  
356 because our experimental data does not suggest that these mechanisms are relevant to our situa-  
357 tion. Furthermore, it is not always clear that using a more complicated mathematical model, with  
358 additional mechanisms and additional unknown parameters, necessarily leads to improved biological  
359 insight. In fact, simply incorporating additional mechanisms and parameters into the mathematical  
360 model often leads to a situation where multiple parameter combinations lead to equivalent predic-  
361 tions which limits the usefulness of the mathematical model (Simpson et al., 2006). In this study,  
362 our approach is to be guided by experimental data and our ability to infer the parameters in a math-  
363 ematical model based on realistic amounts of experimental data (Maclaren et al. 2015). In particular  
364 we use three experimental data sets to calibrate the IBM, and an additional data set to separately  
365 examine the predictive capability of the calibrated IBM. We find that the process of calibrating the  
366 IBM leads to well defined posterior distributions of the model parameters, and that the calibrated  
367 IBM produces a reasonable match to the experimental data. The process of calibrating the IBM,  
368 and then separately testing the predictive capability of the calibrated IBM, provides some confidence  
369 that the level of model complexity is appropriate for our purposes.

370 An interesting feature of our approach is that the ABC marginal posterior distributions for each  
371 parameter overlap for each independent experimental data set. This is reassuring as it suggests  
372 that the same IBM mechanism matches the three independent experimental data sets using similar  
373 parameters. Another approach would be to use ABC to parameterise the IBM by matching all  
374 the experimental data sets simultaneously. Although this alternative approach is valid, it does not  
375 allow us to examine whether the parameter estimates are consistent across the three independent  
376 experiments. Additional confidence in the calibrated IBM is provided by predicting the evolution of  
377 a fourth independent experimental data set by performing IBM simulations with parameters sampled  
378 from the combined marginal posterior distributions.

379 An interesting feature of all experimental data at early time, when the cell density is relatively  
380 low, is that the pair correlation measure suggests that the cells are clustered at short intervals, and

381 that this clustering becomes less pronounced with time. This observation is very different to the way  
382 that previous theoretical studies have viewed the role of spatial structure. For example, previous  
383 simulation-based studies assume that some initial random spatial arrangement of cells can lead to  
384 clustering at later times (Baker and Simpson, 2010). In contrast, our experimental data suggests it  
385 could be more realistic to consider that the spatial structure is imposed by the initial arrangement  
386 of cells. Moreover, since all of our experimental data involves some degree of spatial clustering,  
387 our work highlights the importance of using appropriate models to provide a realistic representation  
388 of key phenomena. Almost all continuum models of collective behaviour in cell populations take  
389 the form of ordinary differential equations and partial differential equations that implicitly invoke a  
390 mean-field assumption (Tremel et al., 2009; Sengers et al., 2007; Maini et al., 2004b; Sarapata and  
391 de Pillis, 2014; Sherratt and Murray, 1990). Such assumptions ignore the role of spatial structure.  
392 While pair-wise models that avoid mean-field assumptions are routine in some fields, such as disease  
393 spreading (Sharkey et al., 2006; Sharkey, 2008) and ecology (Law et al., 2003), models that explicitly  
394 account for spatial structure are far less common for collective cell behaviour.

395 Using our parameter estimates, the continuum spatial moment description could be used to inter-  
396 pret experimental data sets with larger numbers of cells (Binny et al., 2016b), such as experimental  
397 images showing a wider field-of-view, or experiments initiated with a higher density of cells. Our  
398 approach to estimate the parameters in the model is to work with the IBM since this allows us more  
399 flexibility in connecting with the experimental data, such as choosing the initial locations of the  
400 agents in the IBM to precisely match the initial locations of cells in the experimental images.

401 There are many ways that our study could be extended. For example, here we choose a sum-  
402 mary statistic encoding information about the first two spatial moments. However, other summary  
403 statistics may provide different insight, and it could be of interest to explore the effect of this choice.  
404 For example, here we describe the spatial structure over a relatively short spatial interval, approxi-  
405 mately  $2\sigma$ . It could be of interest to repeat our analysis with a wider interval, however this would  
406 incur additional computational costs. Another approach to extend our work would be to repeat the  
407 inference procedure without making any assumptions relating  $p$  and  $\gamma_p$ , and  $m$  and  $\gamma_m$ . Such an  
408 approach would be more computationally expensive and probably require additional experimental

409 data. Therefore, we leave these topics for future consideration.

## 410 **5. Acknowledgements**

411 This work is supported by the Australian Research Council (DP140100249, DP170100474) and  
412 the Royal Society of New Zealand Marsden Fund (11-UOC-005). Computational resources provided  
413 by the High Performance Computing and Research Support Group at QUT are appreciated. We also  
414 thank David Warne for technical advice.

## 415 **6. References**

- 416 [1] Baker RE, Simpson MJ. 2010. Correcting mean-field approximations for birth-death-movement  
417 processes. *Phys Rev E* **82**, 041905.
- 418 [2] Binny RN, Haridas P, James A, Law R, Simpson MJ, Plank MJ. 2016a. Spatial structure arising  
419 from neighbour-dependent bias in collective cell movement. *PeerJ* **4**, e1689.
- 420 [3] Binny RN, James A, Plank MJ. 2016b. Collective cell behaviour with neighbour-dependent pro-  
421 liferation, death and directional bias. *Bull Math Biol* **78**, 2277–2301.
- 422 [4] Bosco DB, Kenworthy R, Zorio DAR, Sang QXA. 2015. Human mesenchymal stem cells are  
423 resistant to paclitaxel by adopting a non-proliferative fibroblastic state. *PLoS One* **10**, e0128511.
- 424 [5] Bourseguin J, Bonet C, Renaud E, Pandiani C, Boncompagni M, Giuliano S, Pawlikowska P,  
425 Karmous-Benailly H, Ballotti R, Rosselli F, Bertolotto C. 2016. FANCD2 functions as a critical  
426 factor downstream of MiTF to maintain the proliferation and survival of melanoma cells. *Sci Rep*  
427 **6**, 36539.
- 428 [6] Browning AP, McCue SW, Simpson MJ. 2017. A Bayesian computational approach to explore  
429 the optimal duration of a cell proliferation assay. *Bull Math Biol* **10** 1888–1906.
- 430 [7] Cai AQ, Landman KA, Hughes BD. 2007. Multi-scale modeling of a wound-healing cell migration  
431 assay. *J Theor Biol* **245**, 576–594.

- 432 [8] Codling EA, Plank MJ, Benhamou S. 2008. Random walk models in biology. *J R Soc Interface*  
433 **5**, 813–834.
- 434 [9] Collis J, Connor AJ, Paczkowski M, Kannan P, Pitt-Francis J, Byrne HM, Hubbard ME. 2017.  
435 Bayesian calibration, validation and uncertainty quantification for predictive modelling of tumour  
436 growth: a tutorial. *Bull Math Biol* **79**, 939–974.
- 437 [10] Fletcher AG, Breward CJW, Chapman SJ. 2012. Mathematical modelling of monoclonal con-  
438 version in the colonic crypt. *J Theor Biol* **300**, 118–133.
- 439 [11] Forbes C, Evans M, Hastings N, Peacock B. 2011. *Statistical distributions*. 4th ed. John Wiley  
440 & Sons, New Jersey.
- 441 [12] Frascoli F, Hughes BD, Zaman MH, Landman KA. 2013. A computational model for collective  
442 cellular motion in three dimensions: general framework and case study for cell pair dynamics. *PLoS*  
443 *ONE* **8**, e59249.
- 444 [13] Gillespie DT. 1977. Exact stochastic simulation of coupled chemical reactions. *J Phys Chem* **81**,  
445 2340–2361.
- 446 [14] Kabla AJ. 2012. Collective cell migration: leadership, invasion and segregation. *J R Soc Interface*  
447 **9** 20120448.
- 448 [15] Jin W, Shah ET, Penington CJ and McCue SW, Chopin LK, Simpson MJ. 2016. Reproducibility  
449 of scratch assays is affected by the initial degree of confluence: Experiments, modelling and model  
450 selection. *J Theor Biol* **390**, 136–145.
- 451 [16] Jin W, Shah ET, Penington CJ, McCue SW, Maini PK, Simpson MJ. 2017. Logistic proliferation  
452 of cells in scratch assays is delayed. *Bull Math Biol* **79**, 1028–1050.
- 453 [17] Johnston ST, Simpson MJ, McElwain DLS, Binder BJ, Ross JV. 2014. Interpreting scratch  
454 assays using pair density dynamics and approximate Bayesian computation. *Open Biol* **4**, 140097.

- 455 [18] Johnston ST, Shah ET, Chopin LK, McElwain DLS, Simpson MJ. 2015. Estimating cell diffu-  
456 sivity and cell proliferation rate by interpreting IncuCyte ZOOM<sup>TM</sup> assay data using the Fisher-  
457 Kolmogorov model. *BMC Syst Biol* **9**, 38.
- 458 [19] Johnston ST, Ross JV, Binder BJ, McElwain DLS, Haridas P, Simpson MJ. 2016. Quantifying  
459 the effect of experimental design choices for in vitro scratch assays. *J Theor Biol* **400**, 19–31.
- 460 [20] Kaighn ME, Narayan KS, Ohnuki Y, Lechner JF, Jones LW. 1979. Establishment and charac-  
461 terization of a human prostatic carcinoma cell line (PC-3). *Invest Urol* **17**, 16–23.
- 462 [21] Law R, Murrell DJ, Dieckmann U. 2003. Population growth in space and time: Spatial logistic  
463 equations. *Ecology* **84**, 252–262.
- 464 [22] Liepe J, Kirk P, Filippi S, Toni T, Barnes CP, Stumpf MPH. 2014. A framework for parameter  
465 estimation and model selection from experimental data in systems biology using approximate  
466 Bayesian computation. *Nat Protoc* **9**, 439–456.
- 467 [23] Maclaren OJ, Byrne HM, Fletcher AG, Maini PK. 2015. Models, measurement and inference in  
468 epithelial tissue dynamics. *Math Biosci Eng* **12**, 1321 – 1340.
- 469 [24] Maini PK, McElwain DLS, Leavesley DI. 2004. Traveling wave model to interpret a wound-  
470 healing cell migration assay for human peritoneal mesothelial cells. *Tissue Eng* **10**, 475–482.
- 471 [25] Mathworks. 2017. Kernel smoothing function estimate for univariate and bivariate data.  
472 <http://www.mathworks.com/help/stats/ksdensity.html>. Accessed: June 2017.
- 473 [26] Murray JD. 2002. *Mathematical Biology*. Springer, Berlin.
- 474 [27] Peirce SM, Van Gieson EJ, Skalak TC. 2004. Multicellular simulation predicts microvascular  
475 patterning and in silico tissue assembly. *FASEB J* **18**, 731–733.
- 476 [28] Plank MJ, Simpson MJ. 2012. Models of collective cell behaviour with crowding effects: com-  
477 paring lattice-based and lattice-free approaches. *J R Soc Interface* **9**, 2983–2996.

- 478 [29] Read M, Andrews PS, Timmis J, Kumar V. 2012. Techniques for grounding agent-based sim-  
479 ulations in the real domain: a case study in experimental autoimmune encephalomyelitis. *Math*  
480 *Comp Model Dyn* **18**, 67–86.
- 481 [30] Sarapata EA, de Pillis LG. 2014. A comparison and catalog of intrinsic tumor growth models.  
482 *Bull Math Biol* **76**, 2010–2024.
- 483 [31] Sengers BG, Please CP, Oreffo ROC. 2007. Experimental characterization and computational  
484 modelling of two-dimensional cell spreading for skeletal regeneration. *J R Soc Interface* **4**, 1107.
- 485 [32] Sharkey KJ, Fernandez C, Morgan KL, Peeler E, Thrush M, Turnbull JF, Bowers RG. 2006.  
486 Pair-level approximations to the spatio-temporal dynamics of epidemics on asymmetric contact  
487 networks. *J Math Biol* **53**, 61–85.
- 488 [33] Sharkey KJ. 2008. Deterministic epidemiological models at the individual level. *J Math Biol* **57**,  
489 311–331.
- 490 [34] Sherratt JA, Murray JD. 1990. Models of epidermal wound healing. *P Roy Soc Lond B* **241**, 29.
- 491 [35] Simpson MJ, Landman KA, Hughes BD, Newgreen DF. 2006. Looking inside an invasion wave  
492 of cells using continuum models: Proliferation is the key. *J Theor Biol* **243**, 343–360.
- 493 [36] Stichel D, Middleton AM, Müller BF, Depner S, Klingmüller U, Breuhahn K, Matthäus F.  
494 2017. An individual-based model for collective cancer cell migration explains speed dynamics and  
495 phenotype variability in response to growth factors. *NPJ Syst Biol Appl* **3**, 5.
- 496 [37] Tanaka MM, Francis AR, Luciani F, Sisson SA. 2006. Using approximate Bayesian com-  
497 putation to estimate tuberculosis transmission parameters from genotype data. *Genetics* **173**, 1511–1520.
- 498 [38] Tang L, van de Ven AL, Guo D, Andasari V, Cristini V, Li KC, Zhou X. 2014. Computational  
499 modeling of 3D tumor growth and angiogenesis for chemotherapy evaluation. *PLoS One* **9**, e83962.
- 500 [39] Treloar KK, Simpson MJ, Haridas P, Manton KJ, Leavesley DI, McElwain DLS, Baker RE. 2013.  
501 Multiple types of data are required to identify the mechanisms influencing the spatial expansion  
502 of melanoma cell colonies. *BMC Syst Biol* **7**, 137.



- 503 [40] Tremel A, Cai A, Tirtaatmadja N, Hughes BD, Stevens GW, Landman KA, O'Connor AJ. 2009.  
504 Cell migration and proliferation during monolayer formation and wound healing. *Chem Eng Sci*  
505 **64**, 247–253.
